# Supplementary material for: The role of the Cys-X-X-X-Cys motif on the kinetics of cupric ion loading to the Streptomyces lividans Sco protein
Source: Royal Society of Chemistry journal article supplement (doi:10.1039/c3dt50540e), 2013-01-01
Supplement: c3dt50540e.pdf [file c3dt50540e.pdf]

## Supporting Information

The role of the Cys-X-X-X-Cys motif on the kinetics of cupric ion loading to the *Streptomyces lividans* Sco protein

**Katie L.I.M. Blundell<sup>1</sup>, Michael T. Wilson<sup>1</sup>, Erik Vijgenboom<sup>2</sup> and Jonathan A.R. Worrall<sup>1</sup>**

<sup>1</sup>School of Biological Sciences, University of Essex, Wivenhoe Park, Colchester, CO4 3SQ, UK. <sup>2</sup>Molecular Biotechnology, Institute of Biology Leiden, Sylvius Laboratory, Leiden University, PO Box 9505, 2300RA Leiden, The Netherlands.

Correspondence addressed to: Jonathan Worrall, Tel: +44 1206 872095; email: [jworrall@essex.ac.uk](mailto:jworrall@essex.ac.uk)

**Table S1:** Output from Dichroweb of average secondary structure content for apo-Sco<sup>SI</sup> and the two Cys mutants. The data for apo-Sco<sup>SI</sup> was taken from<sup>1</sup>.

| Protein               | % $\alpha$ -helix <sup>a</sup> | % $\beta$ -sheet <sup>a</sup> | % Turn <sup>a</sup> | % Unordered <sup>a</sup> |
|-----------------------|--------------------------------|-------------------------------|---------------------|--------------------------|
| Apo-Sco <sup>SI</sup> | 35.0                           | 18.7                          | 16.2                | 30.0                     |
| Apo-C86A              | 30.2                           | 15.7                          | 20.2                | 34.0                     |
| Apo-C90A              | 38.0                           | 13.5                          | 17.6                | 31.1                     |

Secondary structure content determined from X-ray structures

| Protein                          | % $\alpha$ -helix | % $\beta$ -sheet | % Other | PDB  |
|----------------------------------|-------------------|------------------|---------|------|
| <i>Bacillus Subtilis</i><br>Sco  | 26                | 22               | 52      | 1XZ0 |
| <i>Bacillus anthracis</i><br>Sco | 31                | 17               | 52      | 4HDE |

<sup>a</sup>All analysis carried out on far-UV CD spectra recorded at 20 °C and pH 7.0.

## References

1. K. L. I. M. Blundell, M. T. Wilson, D. A. Svistunenko, E. Vijgenboom and J. A. R. Worrall, *Open biology*, 2013, **3**, 120163.
